# Supplementary material for: Mitochondria Participate in Chemoresistance to Cisplatin in Human Ovarian Cancer Cells
Source: Oxford University Press journal article supplement (doi:10.1158/1541-7786.mcr-19-1145), 2020-05-29
Supplement: 15417786mcr191145-sup-233144_3_supp_6288871_qp5pl5.pdf [file 15417786mcr191145-sup-233144_3_supp_6288871_qp5pl5.pdf]

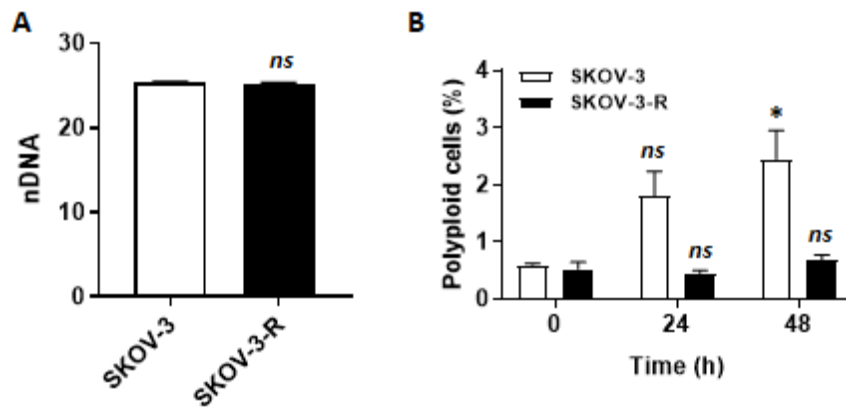

**Figure S2. Acute cisplatin treatment increases SKOV-3 cell polyploidy.** (A) Basal nuclear DNA (nDNA) content was quantified in SKOV-3 and SKOV-3-R cells ( $N = 2$ ,  $n = 7-9$ ). (B) Cells were treated with 10  $\mu\text{M}$  of cisplatin for the indicated times, after which the percentage of polyploid cells was determined. ( $N = 2$ ,  $n = 3-4$ ). \*  $P < 0.05$ , *ns*  $P > 0.05$ ; by Student's  $t$  test (A) or one-way ANOVA *versus* time 0 for the same cell line (B).
